# Supplementary material for: Utilising the native plasmid, pCA2.4, from the cyanobacterium Synechocystis sp. strain PCC6803 as a cloning site for enhanced product production
Source: PubMed Central journal article supplement (PMC4665902; doi:10.1186/s13068-015-0385-x), 2015-12-01

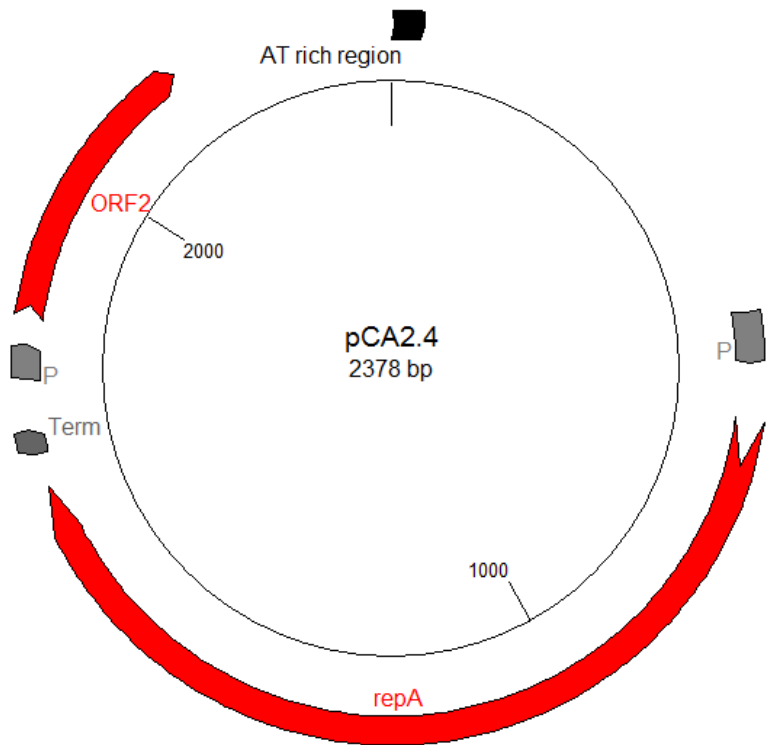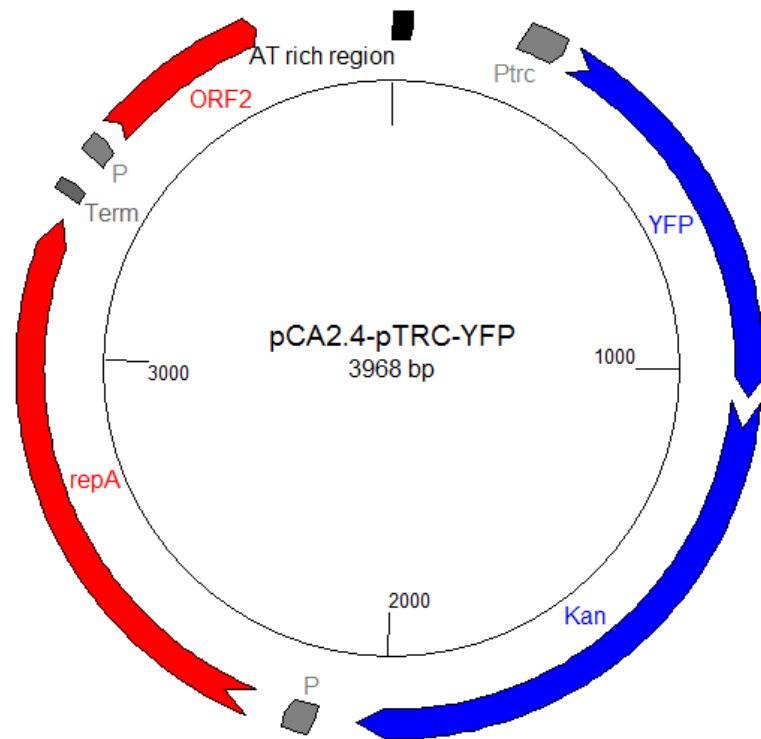

Supplement: 13068_2015_385_MOESM1_ESM.pdf [file 13068_2015_385_MOESM1_ESM.pdf]
